# Supplementary material
Source: ML conference proceedings conference paper supplement (https://aclanthology.org/2024.lrec-main.1256)
Supplement: OptionalSupplementaryMaterial [file 2024.lrec-main.1256.OptionalSupplementaryMaterial.zip]

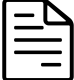

Document ID: 210713911

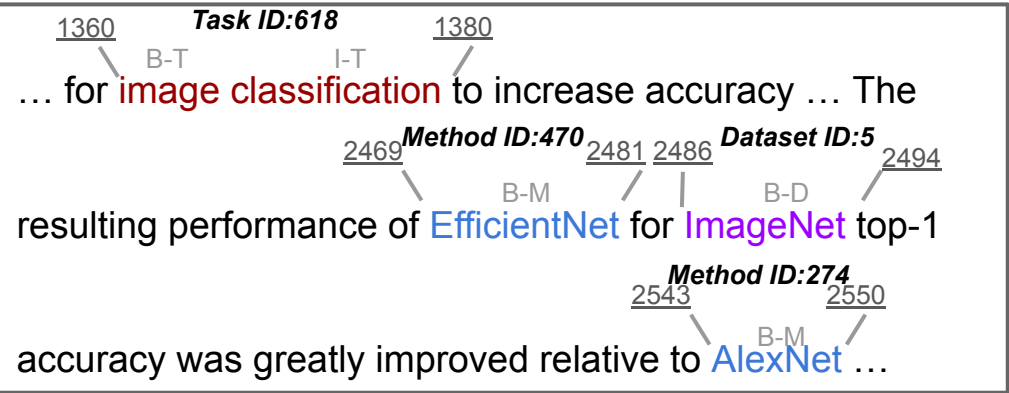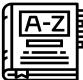

Method ID: 274

|             |                                                                                                                                                           |
|-------------|-----------------------------------------------------------------------------------------------------------------------------------------------------------|
| Name        | 'AlexNet'                                                                                                                                                 |
| Full Name   | "                                                                                                                                                         |
| Acronym     | "                                                                                                                                                         |
| Regexs      | ['Alex-*\\s*Net']                                                                                                                                         |
| Description | '**AlexNet** is a classic convolutional neural ...'                                                                                                       |
| Paper       | {'title': 'ImageNet Classification with Deep Convolutional Neural Networks', 'url': 'https://paperswithcode.com/paper/imagenet-classification-with-deep'} |
| Collections | [{'collection': 'Convolutional Neural Networks', 'area_id': 'computer-vision', 'area': 'Computer Vision'}]]                                               |

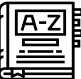

Dataset ID: 5

|             |                                                                                              |
|-------------|----------------------------------------------------------------------------------------------|
| Name        | 'ImageNet'                                                                                   |
| Full Name   | "                                                                                            |
| Variants    | []                                                                                           |
| Acronym     | "                                                                                            |
| Regexs      | ['Image-*\\s*Net']                                                                           |
| PwC URL     | 'https://paperswithcode.com/dataset/imagenet'                                                |
| Description | 'The **ImageNet** dataset contains 14,197,122 annotated images ...'                          |
| Modalities  | ['Images']                                                                                   |
| Tasks       | ['Image Classification', 'Zero-Shot Learning', 'Image Generation', 'Few-Shot Learning' ... ] |

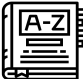

Task ID: 618

|             |                                                                                                       |
|-------------|-------------------------------------------------------------------------------------------------------|
| Name        | 'Image Classification'                                                                                |
| Full Name   | "                                                                                                     |
| Variants    | []                                                                                                    |
| Acronym     | "                                                                                                     |
| Regexs      | ['Image-*\\s*Classification']                                                                         |
| PwC URL     | 'https://paperswithcode.com/task/image-classification'                                                |
| Description | '**Image Classification** is a fundamental task that attempts to comprehend an entire image as a ...' |
| ITO Paths   | [['AI process', 'Vision process', 'Image classification']]                                            |
