# Supplementary material
Source: ML conference proceedings conference paper supplement (https://aclanthology.org/2024.lrec-main.1256)

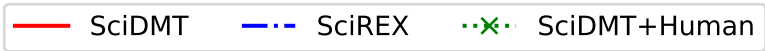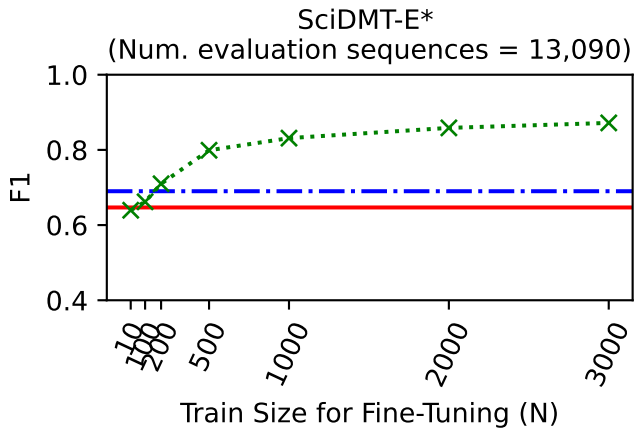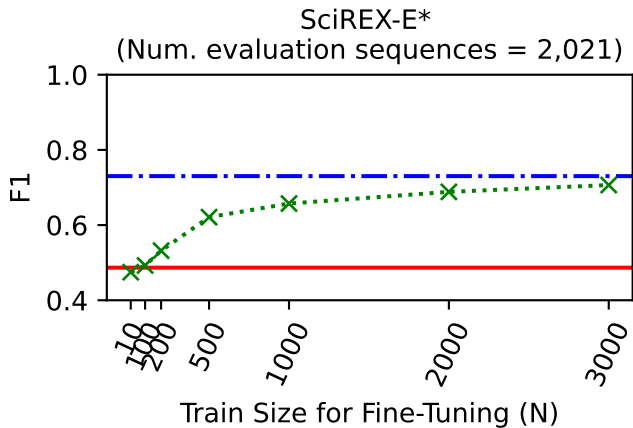

Supplement: OptionalSupplementaryMaterial [file 2024.lrec-main.1256.OptionalSupplementaryMaterial.zip]

—▲— F1      ···×··· Precision      -●- Recall

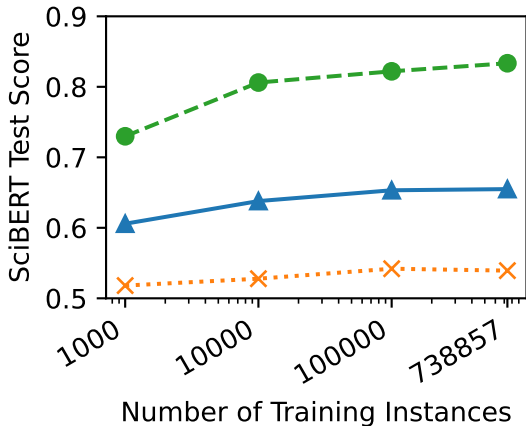

Supplement: OptionalSupplementaryMaterial [file 2024.lrec-main.1256.OptionalSupplementaryMaterial.zip]
